# Supplementary material
Source: Springer Nature journal article supplement (https://www.springermedizin.de/resource/supplementary/12916_2006_80_MOESM2_ESM.pdf/9599126)

% consultations

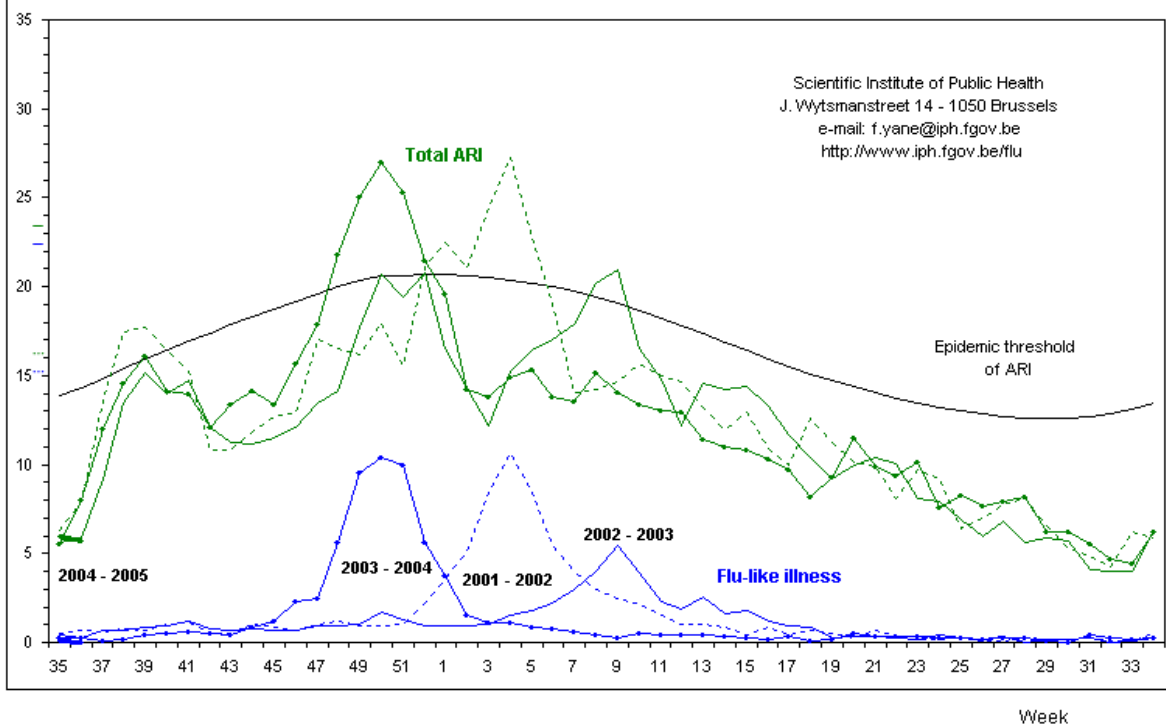

Supplement: MOESM2 [file 9599126]
